# Supplementary material
Source: publisher site journal article supplement (https://www.dovepress.com/article/596457)
Supplement: Supplementary file 1 [file 596457%20Revised%20supplementary.docx]

**Continued Use of Medications Withdrawn Internationally for Safety Concerns: Insights from an Urban Employed Population in China**

Luyi Chen1*

Yuzhi Han1*

Shaoxi Pan2

Shanshan Li3,4

Shujun Wang5

Hongyan Wu1,6#

Beini Lyu4#

*These authors contributed equally to this work

#Correspondence to: Hongyan Wu (hongyanwu@gmc.edu.cn), Beini Lyu (blyu@pku.edu.cn)

Affiliations

1.School of Public Health, Guizhou Medical University, Guiyang, China

2.Department of Health Economics and Medical Insurance, Xinqiao Hospital, Army Medical University, Chongqing, China

3.Department of Global Health, School of Public Health, Peking University, Beijing, China

4.Institute for Global Health and Development, Peking University, Beijing, China

5.School of Economics, Peking University, Beijing, China

6.School of Medicine and Health Management, Guizhou Medical University, Guiyang, China

Correspondence:

Hongyan Wu

School of Public Health

Guizhou Medical University

Gui An New District. Guiyang, Guizhou Province, China, 550025

Tel : +86 180 9601 8661

Email: hongyanwu@gmc.edu.cn

Beini Lyu

Institute for Global Health and Development

Peking University

5 Yiheyuan Road, Haidian District. Beijing, China, 100871

Tel : +86 10 62757318

Email: blyu@pku.edu.cn

**Table of contents**

STable 1. List of withdrawn drugs for safety concerns found in our study

STable 2. Usage and Expenditures of Withdrawn Drugs by ATC Classifications

STable 3. Top 10 drugs in terms of utilization and expenditures.

STable 4. Usage and expenditures of withdrawn drugs by medical insurance types

STable 5. Associations between patient and institution characteristics and use of withdrawn medications for safety concerns in inpatient setting

STable 6. Associations between patient and institution characteristics and use of withdrawn medications for safety concerns in outpatient setting

## STable 1. List of withdrawn drugs for safety concerns found in our study

|  | **Withdrawn medication** | **ATC Category** | **Year of first withdrawal** | **Therapeutic indication** | **Evidence level** | **Market of withdrawal** | **Toxicity type/Reason for withdrawall** | **Use in CHINA** |
| --- | --- | --- | --- | --- | --- | --- | --- | --- |
| 1 | Furazolidone | Anti-infective for system use | 1977 | Bacterial infection | 4 | Japan, Iraq, Malaysia, South Korea, Lebanon, Yemen, India | Skin, hematologic, nervous, respiratory, sensory | Single-ingredient remain unaffected, combination formulations prohibited from sale.1 |
| 2 | Cinepazide | Cardiovascular system | 1987 | Cerebrovascular disease | 4 | Egypt, Spain | Hematologic | Listed in the first edition of the National Key Drug Monitoring List (2019).2 |
| 3 | Phenylbutazone | Musculo-skeletal system | 1985 | Analgesia | 4 | United Arab Emirates, Armenia, Bangladesh, Bahrain, Chile, Germany, Ethiopia, Ghana, Jordan, Sri Lanka, Malaysia, Panama | Hematologic | Regularly available |
| 4 | Rosiglitazone | Alimentary tract and metabolism | 2011 | Diabetes | 1 | UK; New Zealand; South Africa, India | Cardiovascular | Regularly available |
| 5 | Cisapride | Alimentary tract and metabolism | 1999 | Gastro-esophageal reflux | 4 | Armenia, Brunei, Bahrain, Palestine, Canada,Cuba, Germany, UK, India, Japan, Mauritius, Oman, Philippines, Singapore, Türkiye, USA | Cardiovascular | Regularly available |
| 6 | Proglumide | Alimentary tract and metabolism | 1989 | Peptic ulcer | 3 | Germany, Japan | Respiratory | Regularly available |
| 7 | Metamizole (dipyrone) | Nervous system | 1974 | Analgesia | 4 | 9 European, 11 Asian, and 5 African countries; Australia; USA; Mexico; Canada | Hematologic, immunologic (agranulocytosis) | Since March, 2020, most formulations of the drug have been banned in China, with additional restrictions introduced in 2021, virtually unavailable on the market.3 |
| 8 | Terfenadine | Respiratory system | 1997 | Antihistamines for systemic use | 4 | 3 European, 2 African, 3 Asian & 3 South American countries; USA, Canada | Cardiovascular, immunologic, liver, skin | Regularly available |
| 9 | Levamisole | Antiparasitic products, insecticides and repellents | 1999 | Worm infestation | 3 | US, Canada, Vietnam | Hematologic, nervous system | Regularly available |
| 10 | Boric acid | Dermatologicals | 1990 | antiinfective (otological use) | 4 | France, UK, India, Peru, USA | Multiple | In April 2020, China banned the use of medicines containing boric acid and borates in infants and young children.4 |
| 11 | Phenolphthalein | Alimentary tract and metabolism | 1979 | Constipation | 4 | Europe, Yemen, Bangladesh, Canada, France, Morocco, Oman, Japan, Saudi Arabia, Bahrain | Skin, metabolic, muscular | Phenolphthalein tablets and lozenges suspended the production, sale, and use, and revoked all product registration certificates in 2021.5 |
| 12 | Erythromycin estolate | Antiinfective for system use | 1977 | Bacterial infection | 4 | UK, Bahrain, Denmark, Greece, Mauritius, Peru, Sudan, Sweden | Hepatic | Regularly available |
| 13 | Acitretin | Dermatologicals | 1990 | Psoriasis | 5* | France, Nethelands | Reproductive | Regularly available |
| 14 | Bufexamac | Dermatologicals | 2010 | Analgesia | 4 | European Union, Madagascar | Multiple | Regularly available, OTC |
| 15 | Benzbromarone | Musculo-skeletal system | 2003 | Gout | 4 | Portugal, France | Liver | Regularly available |
| 16 | Adenosine Phosphate | Various | 1973 | Cardiac arrhythmia | 4 | USA | Cardiovascular | Regularly available |
| 17 | Aprotinin | Blood and blood forming organs | 2007 | Bleeding | 4 | Worldwide | Increased risk of death | Sale and use of aprotinin injection suspended since 20076 |
| 18 | Bismuth salts | Alimentary tract and metabolism | 1978 | Dyspepsia | 4 | France; Egypt; Japan; Greece; Austria; Bangladesh; Turkey; Mauritius; Oman; Cuba; India | Nervous, cardiovascular | Regularly available, OTC |
| 19 | Chloroquine | Antiparasitic products, insecticides and repellents | 1975 | Malaria | 4 | Japan, Guinea Bissau | Eyes | Regularly available |
| 20 | Codeine | Nervous system | 1985 | Analgesia | 4 | Bangladesh, Malaysia | Abuse | Prohibited for individuals under 18 years of age and classified under the Controlled Narcotic Drugs Catalogue for regulatory supervision.7 |
| 21 | Cyclandelate | Cardiovascular system | 1996 | Raynaud's disease | 4 | USA | Not effective for use | Regularly available |
| 22 | Diphenoxylate | Alimentary tract and metabolism | 1990 | Diarrhea | 4 | Libya, Pakistan, Mexico, Nepal,Philippines, South Korea, Lebanon, Thailand | Nervous system | Classified under the Controlled Narcotic Drugs Catalogue for regulatory supervision.7 |
| 23 | Letrozole | Antineoplastic and immunomodulating agents | 2011 | Hormonally-responsive breast cancer | 3 | India | Teratogenic | Regularly available |
| 24 | Methylphenidate | Nervous system | 1982 | ADHD | 4 | Turkey, Oman, Nigeria | Drug abuse | Regularly available |
| 25 | Pseudoephedrine | Respiratory system | 2008 | Nasal decongestion | 3 | Iraq, Colombia, Thailand | Nervous, GIT, immunologic, cardiovascular, teratogenic | Regularly available, OTC |
| 26 | Phenobarbital | Nervous system | 1985 | Hypnosedation, convulsion | 4 | Germany, France, Mauritius, Sweden | Multiple, dermatological | Permitted for clinical use, but classified as a Category II psychotropic substance under special regulatory control.7 |
| 27 | Vincamine | Cardiovascular system | 1987 | Meniere's disease, vertigo | 4 | Germany, Hungary | Hematologic | Regularly available |
| 28 | Dequalinium chloride | Antiinfective for system use | 1984 | Disinfectant | 4 | Greece | Low efficacy, skin reaction | Regularly available, OTC |
| 29 | Glycosaminoglycan | Cardiovascular system | 1982 | Rheumatism | 3 | Germany | Hematologic | Regularly available |
| 30 | Ganglioside (bovine) | Nervous system | 1989 | Peripheral neuropathies | 3 & 5 | Germany | Nervous system | Listed in the first edition of the National Key Drug Monitoring List (2019).2 |
| 31 | Human placental extract | Various | 1994 | Arthritis, eczema, acne vulgaris | 4 | Germany, UK, India | Neurotoxicity; Immune; skin | Regularly available |
| 32 | Bovine tissue-derived medicines | Nervous system | 1989 | Various | 4 | Ireland, Switzerland, France | Neurotoxicity | Listed in the first edition of the National Key Drug Monitoring List (2019).2 |
| 33 | Bromfenac | Sensory organs | 1998 | Analgesia | 4 | USA, Saudi Arabia | Liver | Regularly available |
| 34 | Noscapine | Respiratory system | 1991 | Cough | 5* | UK, Netherlands | carcinogenicity | Regularly available, OTC |
| 35 | Ethinyl estradiol | Genito urinary system and sex hormones | 2004 | Contraception | 3 | Germany, France | Venous thrombosis | Regularly available |
| 36 | Parecoxib | Musculo-skeletal system | 2005 | Analgesia | 2 | USA, European Union | Cardiovascular, respiratory | Regularly available |
| 37 | Pioglitazone | Alimentary tract and metabolism | 2011 | Diabetes | 3 | European Union | Ccarcinogenicity | Regularly available |
| 38 | Aminophenazone  (aminopyrine) | Nervous system | 1965 | Renal | 4 | 10 European, 14 Asian, 4 African countries; Australia; USA; Canada; Chile; Brazil; Venezuela | Hematologic, carcinogenic | Single-ingredient formulations withdrawn from market in 1982. In 2021, the NMPA revoked the registration of several aminopyrine-containing compound formulations and related products.8,9 |

**Note:** * First withdrawal based on evidence from animal research.

**Abbreviations:** NMPA, National Medical Products Administration; OTC,Over The Counter; UK, The United Kingdom; USA, The United States of America.

## STable 2. Usage and Expenditures of Withdrawn Drugs by ATC Classifications

|  | **2019** | | | **2020** | | | **2021** | | |
| --- | --- | --- | --- | --- | --- | --- | --- | --- | --- |
| **Use，number (percentage)*** | **Overall** | **OP** | **IP** | **Overall** | **OP** | **IP** | **Overall** | **OP** | **IP** |
| Nervous | 1877  (41.04) | 628  (25.48) | 1267  (56.49) | 1539  (37.12) | 591  (24.25) | 976  (52.67) | 2890  (37.10) | 1507  (29.58) | 1455  (48.61) |
| Musculo-skeletal | 587  (12.83) | 284  (11.52) | 322  (14.36) | 602  (14.52) | 273  (11.20) | 347  (18.73) | 1067  (13.70) | 451  (8.85) | 646  (21.58) |
| Alimentary tract and metabolism | 555  (12.13) | 475  (19.27) | 105  (4.68) | 557  (13.43) | 486  (19.94) | 102  (5.50) | 929  (11.93) | 833  (16.35) | 168  (5.61) |
| Dermatologicals | 318  (6.95) | 283  (11.48) | 41  (1.83) | 314  (7.57) | 279  (11.45) | 36  (1.94) | 569  (7.30) | 478  (9.38) | 92  (3.07) |
| Sensory organs | 316  (6.91) | 235  (9.53) | 87  (3.88) | 264  (6.37) | 203  (8.33) | 63  (3.40) | 565  (7.25) | 445  (8.74) | 130  (4.34) |
| Antiparasitic  products, insecticides and repellents | 151  (3.30) | 127  (5.15) | 33  (1.47) | 124  (2.99) | 105  (4.31) | 33  (1.78) | 297  (3.81) | 254  (4.99) | 72  (2.41) |
| Respiratory | 158  (3.45) | 143  (5.80) | 16  (0.71) | 153  (3.69) | 142  (5.83) | 11  (0.59) | 312  (4.01) | 294  (5.77) | 18  (0.60) |
| Genito urinary system and sex hormones | 113  (2.47) | 108  (4.38) | 7  (0.31) | 119  (2.87) | 110  (4.51) | 9  (0.49) | 180  (2.31) | 170  (3.34) | 12  (0.40) |
| Anti-infectives for systemic use | 106  (2.32) | 84  (3.41) | 24  (1.07) | 138  (3.33) | 110  (4.51) | 28  (1.51) | 477  (6.12) | 353  (6.93) | 126  (4.21) |
| Antineoplastic and immunomodulating agents | 68  (1.49) | 52  (2.11) | 21  (0.94) | 68  (1.64) | 52  (2.13) | 21  (1.13) | 130  (1.67) | 121  (2.38) | 24  (0.80) |
| Cardiovascular | 110  (2.40) | 46  (1.87) | 65  (2.90) | 135  (3.26) | 105  (4.31) | 31  (1.67) | 276  (3.54) | 227  (4.46) | 50  (1.67) |
| Blood and blood forming organs | 1  (0.02) | 1  (0.04) | 0  (0.00) | 2  (0.05) | 2  (0.08) | 0  (0.00) | 2  (0.03) | 2  (0.04) | 0  (0.00) |
| Others | 524  (11.46) | 84  (3.41) | 442  (19.71) | 401  (9.67) | 72  (2.95) | 333  (17.97) | 529  (6.79) | 99  (1.94) | 433  (14.47) |
| **Expenditures，yuan**** |  |  |  |  |  |  |  |  |  |
| Nervous | 1072416.12  (58.20) | 60394.51  (10.08) | 1012021.61  (81.38) | 536506.40 (40.74) | 55795.96  (8.57) | 480710.44 (72.22) | 476937.14 (23.71) | 104965.27 (9.76) | 371971.87  (39.73) |
| Musculo-skeletal | 291639.28  (15.83) | 284323.50  (47.45) | 7315.78  (0.59) | 330096.67 (25.07) | 322522.60  (49.52) | 7574.07  (1.14) | 585096.02 (29.08) | 567986.00  (52.81) | 17110.02  (1.83) |
| Alimentary tract and metabolism | 161092.8 (8.74) | 120396.80 (20.09) | 40696.00  (3.27) | 170026.97 (12.91) | 148005.70 (22.72) | 22021.27 (3.31) | 151419.14 (7.53) | 142667.00 (13.27) | 8752.14  (0.93) |
| Dermatologicals | 82657.67 (4.49) | 24878.24  (4.15) | 57779.43  (4.65) | 85144.07 (6.47) | 28883.16  (4.43) | 56260.91 (8.45) | 177664.27 (8.83) | 47560.97 (4.42) | 130103.3  (13.90) |
| Sensory organs | 56018.77 (3.04) | 53685.72  (8.96) | 2333.05  (0.19) | 47292.49 (3.59) | 44067.98  (6.77) | 3224.51  (0.48) | 95917.91  (4.77) | 88454.89 (8.22) | 7463.02  (0.80) |
| Antiparasitic  products, insecticides and repellents | 37132.01 (2.02) | 5877.73  (0.98) | 31254.28  (2.51) | 6701.68  (0.51) | 5384.82  (0.83) | 1316.86  (0.20) | 46894.69  (2.33) | 35432.49 (3.29) | 11462.20  (1.22) |
| Respiratory | 23984.89 (1.30) | 19404.23  (3.24) | 4580.66  (0.37) | 21604.93 (1.64) | 17022.33  (2.61) | 4582.60  (0.69) | 44498.14  (2.21) | 30339.54 (2.82) | 14158.60  (1.51) |
| Genito urinary system and sex hormones | 18602.64 (1.01) | 13983.34  (2.33) | 4619.30  (0.37) | 17046.67 (1.29) | 12056.90  (1.85) | 4989.77  (0.75) | 35795.43  (1.78) | 27526.15 (2.56) | 8269.28  (0.88) |
| Anti-infectives for systemic use | 9166.27  (0.50) | 8804.94  (1.47) | 361.33  (0.03) | 8841.24  (0.67) | 8372.74  (1.29) | 468.50  (0.07) | 15138.90  (0.75) | 14301.24 (1.33) | 837.66  (0.09) |
| Antineoplastic and immunomodulating agents | 2384.97  (0.13) | 2132.56  (0.36) | 252.41  (0.02) | 2423.10  (0.18) | 2326.71  (0.36) | 96.39  (0.01) | 4459.03  (0.22) | 4206.54  (0.39) | 252.49  (0.03) |
| Cardiovascular | 1089.80  (0.06) | 792.50  (0.13) | 297.30  (0.02) | 1443.45  (0.11) | 1049.37  (0.16) | 394.08  (0.06) | 4885.75  (0.24) | 3239.79  (0.30) | 1645.96  (0.18) |
| Blood and blood forming organs | 30.00  (0.00) | 30.00  (0.01) | 0.00  (0.00) | 60.00  (0.00) | 60.00  (0.01) | 0.00  (0.00) | 60.00  (0.00) | 60.00  (0.01) | 0.00  (0.00) |
| Others | 86548.22 (4.70) | 4538.95  (0.76) | 82009.27  (6.59) | 89744.62 (6.81) | 5775.67  (0.89) | 83968.95 (12.62) | 372940.40  (18.54) | 8739.60  (0.81) | 364200.80 (38.90) |

**Notes:** *Proportion refers to the percentage of users of this drug type among all patients who received at least one withdrawn drug in the total, outpatient, or inpatient population. **Proportion refers to the percentage of total withdrawn drug expenditures attributable to this drug type in the overall, outpatient, or inpatient setting.

**Abbreviations:** IP, inpatient; OP, outpatient.

## STable 3. Top 10 drugs in terms of utilization and expenditures.

|  | **2019** | | | **2020** | | | **2021** | | |
| --- | --- | --- | --- | --- | --- | --- | --- | --- | --- |
| **Top 10 with the largest number of users** | **ATC Category** | **Drug name** | **Users (%)*** | **ATC Category** | **Drug name** | **Users (%)*** | **ATC Category** | **Drug name** | **Users (%)*** |
| 1 | N | Codeine | 970  (21.21) | N | Codeine | 1018 (24.55) | N | Codeine | 2371 (30.44) |
| 2 | N | Ganglioside (bovine) | 557  (12.18) | M | Benzbromarone | 483  (11.65) | M | Benzbromarone | 787  (10.10) |
| 3 | M | Benzbromarone | 508  (11.11) | V | Adenosine Phosphate | 352  (8.49) | A | Pioglitazone | 698  (8.96) |
| 4 | V | Adenosine Phosphate | 475  (10.38) | A | Pioglitazone | 300  (7.24) | D | Boric acid | 549  (7.05) |
| 5 | N | Bovine tissue-derived medicines | 345  (7.54) | D | Boric acid | 296  (7.14) | N | Bovine tissue-derived medicines | 501  (6.43) |
| 6 | D | Boric acid | 307  (6.71) | N | Ganglioside (bovine) | 286  (6.90) | J | Furazolidone | 396  (5.08) |
| 7 | A | Pioglitazone | 249  (5.44) | N | Bovine tissue-derived medicines | 247  (5.96) | V | Adenosine Phosphate | 354  (4.54) |
| 8 | A | Rosiglitazone | 228  (4.98) | A | Rosiglitazone | 211  (5.09) | R | Pseudoephedrine | 307  (3.94) |
| 9 | N | Phenobarbital | 221  (4.83) | N | Phenobarbital | 178  (4.29) | P | Chloroquine | 290  (3.72) |
| 10 | R | Pseudoephedrine | 156  (3.41) | R | Pseudoephedrine | 153  (3.69) | M | Parecoxib | 283  (3.63) |
| **Top 10 with the highest expenditures** | **ATC Category** | **Drug name** | **Expenditures，yuan**** | **ATC Category** | **Drug name** | **Expenditures，yuan**** | **ATC Category** | **Drug name** | **Expenditures，yuan**** |
| 1 | N | Ganglioside (bovine) | 954165.90 (51.78) | N | Ganglioside (bovine) | 443836.50 (33.70) | A | Pioglitazone | 441533.80 (21.94) |
| 2 | A | Rosiglitazone | 155760.50 (8.45) | A | Pioglitazone | 176503.10 (13.40) | V | Human placental extract | 341906.40 (16.99) |
| 3 | A | Pioglitazone | 133040.80 (7.22) | L | Letrozole | 156922.10 (11.92) | N | Ganglioside (bovine) | 269798.30 (13.41) |
| 4 | L | Letrozole | 132308.80 (7.18) | A | Rosiglitazone | 152384.80 (11.57) | L | Letrozole | 150459.10 (7.48) |
| 5 | N | Bovine tissue-derived medicines | 97446.43 (5.29) | V | Human placental extract | 74759.60 (5.68) | A | Rosiglitazone | 140973.50 (7.00) |
| 6 | V | Human placental extract | 64145.69 (3.48) | N | Codeine | 64012.48 (4.86) | N | Codeine | 139685.70 (6.94) |
| 7 | P | Chloroquine | 55993.40 (3.04) | P | Chloroquine | 47267.40 (3.59) | M | Parecoxib | 109760.00 (5.45) |
| 8 | N | Codeine | 50692.51 (2.75) | M | Parecoxib | 46576.03 (3.54) | P | Chloroquine | 95900.98 (4.76) |
| 9 | M | Parecoxib | 48387.00  (2.63) | N | Bovine tissue-derived medicines | 43262.92 (3.29) | N | Bovine tissue-derived medicines | 74331.15 (3.69) |
| 10 | M | Benzbromarone | 34237.53 (1.86) | M | Benzbromarone | 38509.48 (2.92) | M | Benzbromarone | 67876.82 (3.37) |

**Notes:** *Proportion refers to the percentage of users of this drug type among all patients who received at least one withdrawn drug. **Proportion refers to the percentage of total withdrawn drug expenditures attributable to this drug type.

**Abbreviations:** A, Alimentary tract and metabolism; D, Dermatologicals; J, Antiinfective for system use; L, Antineoplastic and immunomodulating agents; M, Musculo-skeletal system; N, Nervous system; P, Antiparasitic products, insecticides and repellents; R, Respiratory system; V, Various.

## STable 4. Usage and expenditures of withdrawn drugs by medical insurance types

|  | **2019** | | **2020** | | **2021** | |
| --- | --- | --- | --- | --- | --- | --- |
| Use number (percentage) * | Outpatient | Inpatient | Outpatient | Inpatient | Outpatient | Inpatient |
| Category A | 6 (18.18) | 6 (22.22) | 2 (6.67) | 2 (6.90) | 2 (5.71) | 2 (7.41) |
| Category B | 13 (39.39) | 14 (51.85) | 15 (50.00) | 16 (55.17) | 17 (48.57) | 14 (51.85) |
| Category C | 14 (42.43) | 7 (25.93) | 13 (43.33) | 11 (37.93) | 16 (45.71) | 11 (40.74) |
| Expenditure (percentage) ** |  |  |  |  |  |  |
| Category A | 117385.20 (19.59) | 153728.30 (12.36) | 14978.81 (2.30) | 26256.95 (3.94) | 102793.72 (9.56) | 25280.84 (2.70) |
| Category B | 447592.30 (74.69) | 995181.20 (80.03) | 585555.00 (89.90) | 481246.80 (72.30) | 879735.32 (81.80) | 511494.21 (54.63) |
| Category C | 34265.52 (5.72) | 94610.92 (7.61) | 50790.13 (7.80) | 158104.61 (23.75) | 92950.48 (8.64) | 399452.34 (42.67) |

**Notes:** *Number and proportion of withdrawn drugs prescribed in outpatient or inpatient settings in that year. **Expenditure on withdrawn drugs and its proportion of total withdrawn drug costs in outpatient or inpatient care for that year.

## STable 5. Associations between patient and institution characteristics and use of withdrawn medications for safety concerns in inpatient setting

|  | Number of prescriptions | Use of withdrawn drugs, n (%) | Unadjusted OR (95%CI) | Adjusted OR (95%CI)a |
| --- | --- | --- | --- | --- |
| Year |  |  |  |  |
| 2019 | 32069 | 2520 (7.86) | 1.0 (Ref) | 1.0 (Ref) |
| 2020 | 31644 | 2053 (6.49) | 0.81 (0.76, 0.86)*** | 0.80 (0.75, 0.86)*** |
| 2021 | 50697 | 3334 (6.58) | 0.72 (0.67, 0.76)*** | 0.70 (0.65, 0.75)*** |
| Age, years |  |  |  |  |
| < 65 | 67496 | 4227 (6.26) | 1.0 (Ref) | 1.0 (Ref) |
| ≥ 65 | 46914 | 3680 (7.84) | 1.29 (1.23, 1.35)*** | 1.11 (1.04, 1.19)** |
| Sex |  |  |  |  |
| Female | 52698 | 3266 (6.20) | 1.0 (Ref) | 1.0 (Ref) |
| Male | 61712 | 4641 (7.52) | 1.24 (1.18, 1.30)*** | 1.21 (1.15, 1.28)*** |
| Race/ethnicity |  |  |  |  |
| Han | 93210 | 6420 (6.89) | 1.0 (Ref) | 1.0 (Ref) |
| Miao/Dong/Buyi | 7027 | 437 (6.22) | 1.02 (0.91, 1.14) | 1.01 (0.90, 1.14) |
| Others | 14173 | 1050 (7.41) | 1.07 (0.99, 1.16) | 1.03 (0.95, 1.13) |
| Working status |  |  |  |  |
| Working | 50239 | 2983 (5.94) | 1.0 (Ref) | 1.0 (Ref) |
| Retired | 64171 | 4924 (7.67) | 1.30 (1.24, 1.37)*** | 1.18 (1.10, 1.27)*** |
| Occupation |  |  |  |  |
| Agriculture and fishery workers | 17648 | 1296 (7.34) | 1.0 (Ref) | 1.0 (Ref) |
| Industrial and service workers | 18263 | 1248 (6.83) | 1.00 (0.92, 1.09) | 0.97 (0.89, 1.06) |
| Public sector employees | 60712 | 4182 (6.89) | 1.03 (0.96, 1.10) | 0.96 (0.90, 1.04) |
| Professionals | 17787 | 1181 (6.64) | 0.95 (0.87, 1.04) | 0.95 (0.87, 1.03) |
| Insurance |  |  |  |  |
| No additional subsidy | 88468 | 5823 (6.58) | 1.0 (Ref) | 1.0 (Ref) |
| With subsidy | 25942 | 2084 (8.03) | 1.08 (1.02, 1.15)** | 1.04 (0.98, 1.11) |
| In-province visit |  |  |  |  |
| Yes | 113251 | 7851 (6.93) | 1.0 (Ref) | 1.0 (Ref) |
| No | 1159 | 56 (4.83) | 0.98 (0.68, 1.40) | 0.73 (0.50, 1.07) |
| Healthcare institution |  |  |  |  |
| Tertiary | 55452 | 5067 (9.14) | 1.0 (Ref) | 1.0 (Ref) |
| Secondary | 44517 | 2271 (5.10) | 0.90 (0.76, 1.08) | 0.77 (0.64, 0.92)* |
| Primary or others | 14441 | 569 (3.94) | 0.51 (0.43, 0.62)*** | 0.42 (0.34, 0.52)*** |
| Public or private institution |  |  |  |  |
| Public | 97271 | 6951 (7.15) | 1.0 (Ref) | 1.0 (Ref) |
| Private | 17139 | 956 (5.58) | 0.87 (0.76, 1.00) | 1.11 (0.96, 1.29) |
| General/specialized |  |  |  |  |
| Specialized | 7684 | 514 (6.69) | 1.0 (Ref) | 1.0 (Ref) |
| General | 106726 | 7393 (6.93) | 0.87 (0.76, 1.00) | 1.06 (0.87, 1.29) |

**Notes:** aAdjusted model included calendar year, age, sex, race/ethnicity, working status, occupation, insurance, whether or not in-province visit, types of healthcare institution, and city. *p<0.05, **p<0.01, ***p<0.001.

**Abbreviations:** CI, confidence interval; OR, odds ratio.

## STable 6. Associations between patient and institution characteristics and use of withdrawn medications with safety concerns in outpatient setting

|  | Number of prescriptions | Use of withdrawn drugs, n (%) | Unadjusted OR (95%CI) | Adjusted OR (95%CI)a |
| --- | --- | --- | --- | --- |
| Year |  |  |  |  |
| 2019 | 189235 | 4666 (2.47) | 1.0 (Ref) | 1.0 (Ref) |
| 2020 | 188577 | 4589 (2.43) | 0.98 (0.94, 1.02) | 0.96 (0.91, 1.01) |
| 2021 | 363613 | 8683 (2.39) | 1.01 (0.97, 1.06) | 0.99 (0.94, 1.04) |
| Age, years |  |  |  |  |
| <65 | 514101 | 12341 (2.40) | 1.0 (Ref) | 1.0 (Ref) |
| ≥ 65 | 227324 | 5597 (2.46) | 0.83 (0.81, 0.86)*** | 0.76 (0.72, 0.79)*** |
| Sex |  |  |  |  |
| Female | 352,266 | 8873 (2.52) | 1.0 (Ref) | 1.0 (Ref) |
| Male | 389159 | 9065 (2.33) | 0.97 (0.94, 0.99)* | 0.98 (0.95, 1.01) |
| Race/ethnicity |  |  |  |  |
| Han | 634466 | 15932 (2.51) | 1.0 (Ref) | 1.0 (Ref) |
| Miao/Dong/Buyi | 38367 | 684 (1.78) | 1.04 (0.95, 1.13) | 1.03 (0.94, 1.13) |
| Others | 68592 | 1322 (1.93) | 0.92 (0.87, 0.98)* | 0.89 (0.83, 0.95)** |
| Working status |  |  |  |  |
| Working | 409064 | 9120 (2.23) | 1.0 (Ref) | 1.0 (Ref) |
| Retired | 332361 | 8818 (2.65) | 0.96 (0.93, 0.99)* | 1.14 (1.09, 1.19)*** |
| Occupation |  |  |  |  |
| Agriculture and fishery workers | 116773 | 3036 (2.60) | 1.0 (Ref) | 1.0 (Ref) |
| **I**ndustrial and service workers | 118225 | 2828 (2.39) | 0.90 (0.85, 0.95)*** | 0.91 (0.86, 0.96)** |
| Public sector employees | 353027 | 8151 (2.31) | 0.99 (0.94, 1.03) | 0.98 (0.94, 1.03) |
| Professionals | 153400 | 3923 (2.56) | 1.00 (0.95, 1.05) | 0.99 (0.94, 1.04) |
| Insurance |  |  |  |  |
| No additional subsidy | 599444 | 13801 (2.30) | 1.0 (Ref) | 1.0 (Ref) |
| With subsidy | 141981 | 4137 (2.91) | 1.07 (1.03, 1.11)** | 1.10 (1.05, 1.15)*** |
| In-province visit |  |  |  |  |
| Yes | 739891 | 17930 (2.42) | 1.0 (Ref) | 1.0 (Ref) |
| No | 1534 | 8 (0.52) | 0.67 (0.31, 1.45) | 0.52 (0.24, 1.14) |
| Healthcare institution |  |  |  |  |
| Tertiary | 318377 | 10568 (3.32) | 1.0 (Ref) | 1.0 (Ref) |
| Secondary | 229520 | 4610 (2.01) | 0.86 (0.72, 1.02) | 0.85 (0.72, 1.02) |
| Primary or others | 193528 | 2760 (1.43) | 0.33 (0.27, 0.40)*** | 0.31 (0.26, 0.38)*** |
| Public or private institution |  |  |  |  |
| Public | 631686 | 15918 (2.52) | 1.0 (Ref) | 1.0 (Ref) |
| Private | 109739 | 2020 (1.84) | 0.96 (0.85, 1.08) | 1.06 (0.94, 1.20)* |
| General/specialized |  |  |  |  |
| Specialized | 52174 | 1219 (2.34) | 1.0 (Ref) | 1.0 (Ref) |
| General | 689251 | 16719 (2.43) | 1.00 (0.83, 1.20) | 1.18 (0.98, 1.42) |

**Notes:** aAdjusted model included calendar year, age, sex, race/ethnicity, working status, occupation, insurance, whether or not in-province visit, types of healthcare institution, and city. *p<0.05, **p<0.01, ***p<0.001.

**Abbreviations:** CI, confidence interval; OR, odds ratio.

# References

1. Announcement on the Cessation of Production, Sale and Use of Compound Preparations Containing Furazolidone (No. 9 of 2019). https://www.nmpa.gov.cn/xxgk/ggtg/ypggtg/ypqtggtg/20190215114101621.html. Accessed November 14, 2025.

2. Guo X. Circular on Issuing the First Batch of National Key Monitored Rational Drug Use Drug List (Chemical Drugs and Biological Products) _ Documents of State Council Departments _ Chinese Government Network. https://www.gov.cn/zhengce/zhengceku/2019-11/19/content_5453479.htm. Accessed November 14, 2025.

3. Announcement of the National Medical Products Administration on the Cancellation of 34 Drug Registration Certificates Including Mercury Bromide Red Solution (No. 132 of 2021). https://www.nmpa.gov.cn/yaopin/ypggtg/20211104143000131.html. Accessed November 14, 2025.

4. Announcement of the National Medical Products Administration on Revising the Instructions for Drugs Containing Boric Acid and Borates (No. 50 of 2020). https://www.nmpa.gov.cn/xxgk/ggtg/ypggtg/ypshmshxdgg/20200408161301226.html. Accessed November 14, 2025.

5. Announcement of the National Medical Products Administration on the Cancellation of the Drug Registration Certificates of Phenolphthalein Tablets and Phenolphthalein Lozenges (No. 6 of 2021). https://www.nmpa.gov.cn/yaopin/ypggtg/20210114081322118.html. Accessed November 14, 2025.

6. Notice on the Suspension of the Sale and Use of Aprotinin Injection. https://www.nmpa.gov.cn/xxgk/fgwj/gzwj/gzwjyp/20071217174401700.html. Accessed November 14, 2025.

7. Regulations on the Administration of Narcotic Drugs and Psychotropic Drugs - Supplement 2016·2 Bulletin of The State Council - Website of the Chinese Government. https://www.gov.cn/gongbao/content/2016/content_5139413.htm. Accessed November 14, 2025.

8. The Ministry of Health announced the elimination of 127 kinds of drugs - Fujian Medical Journal, Issue 06, 1982. https://www.cnki.com.cn/Article/CJFDTotal-FJYY198206040.htm. Accessed November 14, 2025.

9. Announcement of the National Medical Products Administration on the Cancellation of the Registration Certificates of 8 Varieties of Drugs including Children's Phenolamine Amine Granules (No. 138 of 2021). https://www.nmpa.gov.cn/xxgk/ggtg/ypggtg/ypqtggtg/20211116163812146.html. Accessed November 14, 2025.
